# Supplementary material
Source: PubMed Central journal article supplement (PMC7616160)
Supplement: EMS197032-supplement-Supplementary_Materials.pdf [file EMS197032-supplement-Supplementary_Materials.pdf]

## Reporting Summary

Nature Research wishes to improve the reproducibility of the work that we publish. This form provides structure for consistency and transparency in reporting. For further information on Nature Research policies, see [Authors & Referees](#) and the [Editorial Policy Checklist](#).

### Statistics

For all statistical analyses, confirm that the following items are present in the figure legend, table legend, main text, or Methods section.

n/a Confirmed

- The exact sample size ( $n$ ) for each experimental group/condition, given as a discrete number and unit of measurement
- A statement on whether measurements were taken from distinct samples or whether the same sample was measured repeatedly
- The statistical test(s) used AND whether they are one- or two-sided  
*Only common tests should be described solely by name; describe more complex techniques in the Methods section.*
- A description of all covariates tested
- A description of any assumptions or corrections, such as tests of normality and adjustment for multiple comparisons
- A full description of the statistical parameters including central tendency (e.g. means) or other basic estimates (e.g. regression coefficient) AND variation (e.g. standard deviation) or associated estimates of uncertainty (e.g. confidence intervals)
- For null hypothesis testing, the test statistic (e.g.  $F$ ,  $t$ ,  $r$ ) with confidence intervals, effect sizes, degrees of freedom and  $P$  value noted  
*Give  $P$  values as exact values whenever suitable.*
- For Bayesian analysis, information on the choice of priors and Markov chain Monte Carlo settings
- For hierarchical and complex designs, identification of the appropriate level for tests and full reporting of outcomes
- Estimates of effect sizes (e.g. Cohen's  $d$ , Pearson's  $r$ ), indicating how they were calculated

*Our web collection on [statistics for biologists](#) contains articles on many of the points above.*

### Software and code

Policy information about [availability of computer code](#)

Data collection

Data was collected using, any maze image J, envision, Agilent 6410 series triple quad LC/MS/MS. Ponemah® acquisition system (DSI).

Data analysis

Graph pad Prism, microsoft excel, any maze, MATLAB (version R2018b, Mathworks), MassHunter data analysis software (Agilent Technologies Inc, Santa Clara, CA 95051 U.S.A.). ChronosFit program.

For manuscripts utilizing custom algorithms or software that are central to the research but not yet described in published literature, software must be made available to editors/reviewers. We strongly encourage code deposition in a community repository (e.g. GitHub). See the Nature Research [guidelines for submitting code & software](#) for further information.

### Data

Policy information about [availability of data](#)

All manuscripts must include a [data availability statement](#). This statement should provide the following information, where applicable:

- Accession codes, unique identifiers, or web links for publicly available datasets
- A list of figures that have associated raw data
- A description of any restrictions on data availability

This is given in the manuscript

### Field-specific reporting

Please select the one below that is the best fit for your research. If you are not sure, read the appropriate sections before making your selection.

- Life sciences
- Behavioural & social sciences
- Ecological, evolutionary & environmental sciences

## Life sciences study design

All studies must disclose on these points even when the disclosure is negative.

|                 |                                                                                                                                                                                                                                                                                                                                                                                                                                                                            |
|-----------------|----------------------------------------------------------------------------------------------------------------------------------------------------------------------------------------------------------------------------------------------------------------------------------------------------------------------------------------------------------------------------------------------------------------------------------------------------------------------------|
| Sample size     | The "power" of the experiments was calculated using Student t distribution for two sample hypothesis and two-factor analysis of variance (ANOVA) for studies with multiple factors. For both tests a normal distribution was assumed with equal variances, confidence limits ( $\alpha$ ) of 5%, and the number groups (k=6 on average) of animals (n=variable) per group (k). Power calculation resulted in a 97.5% and 95.5% of power for experiments using these tests. |
| Data exclusions | No data was excluded                                                                                                                                                                                                                                                                                                                                                                                                                                                       |
| Replication     | Experiments were conducted on different patches of cells and on different cohorts of animals to ensure reproducibility                                                                                                                                                                                                                                                                                                                                                     |
| Randomization   | The drugs are administered to cages of animals in a random fashion so that each of the mice within the same cage will receive the same drug treatment but the cages that receive the drug treatment are assigned in a random manner                                                                                                                                                                                                                                        |
| Blinding        | The technicians that conduct the drug treatments and data collection are blinded to the treatments and are blinded to the expected outcomes.                                                                                                                                                                                                                                                                                                                               |

## Reporting for specific materials, systems and methods

We require information from authors about some types of materials, experimental systems and methods used in many studies. Here, indicate whether each material, system or method listed is relevant to your study. If you are not sure if a list item applies to your research, read the appropriate section before selecting a response.

### Materials & experimental systems

| n/a                                 | Included in the study                                           |
|-------------------------------------|-----------------------------------------------------------------|
| <input type="checkbox"/>            | <input checked="" type="checkbox"/> Antibodies                  |
| <input type="checkbox"/>            | <input checked="" type="checkbox"/> Eukaryotic cell lines       |
| <input checked="" type="checkbox"/> | <input type="checkbox"/> Palaeontology                          |
| <input type="checkbox"/>            | <input checked="" type="checkbox"/> Animals and other organisms |
| <input checked="" type="checkbox"/> | <input type="checkbox"/> Human research participants            |
| <input checked="" type="checkbox"/> | <input type="checkbox"/> Clinical data                          |

### Methods

| n/a                                 | Included in the study                           |
|-------------------------------------|-------------------------------------------------|
| <input checked="" type="checkbox"/> | <input type="checkbox"/> ChIP-seq               |
| <input checked="" type="checkbox"/> | <input type="checkbox"/> Flow cytometry         |
| <input checked="" type="checkbox"/> | <input type="checkbox"/> MRI-based neuroimaging |

## Antibodies

|                 |                                                                                                                                                        |
|-----------------|--------------------------------------------------------------------------------------------------------------------------------------------------------|
| Antibodies used | anti-Hemagglutinin (HA) and anti-Na/K ATPase from Roche Bioscience                                                                                     |
| Validation      | The anti-HA antibody was verified with non-expressing HA controls. The Na/K-ATPase antibody is a widely used control with manufacturer's verification. |

## Eukaryotic cell lines

Policy information about [cell lines](#)

|                                                                   |                                                                                  |
|-------------------------------------------------------------------|----------------------------------------------------------------------------------|
| Cell line source(s)                                               | This is given in the manuscript but the cell lines used were derived in house    |
| Authentication                                                    | The cell lines were authenticated by ligand binding and western blot experiments |
| Mycoplasma contamination                                          | All cell lines are regularly checked for microplasma and are microplasma free    |
| Commonly misidentified lines (See <a href="#">ICLAC</a> register) | None we used                                                                     |

## Animals and other organisms

Policy information about [studies involving animals](#); [ARRIVE guidelines](#) recommended for reporting animal research

|                    |                       |
|--------------------|-----------------------|
| Laboratory animals | Mice, male and female |
| Wild animals       | None used             |

Field-collected samples

none used

Ethics oversight

N/A

Note that full information on the approval of the study protocol must also be provided in the manuscript.
